# Supplementary material
Source: Springer Nature journal article supplement (https://www.springermedizin.de/resource/supplementary/12955_2012_1116_MOESM2_ESM.pdf/9559232)

Figure 2: WDQ-G responses in round 1 and 3 according to anchor item response

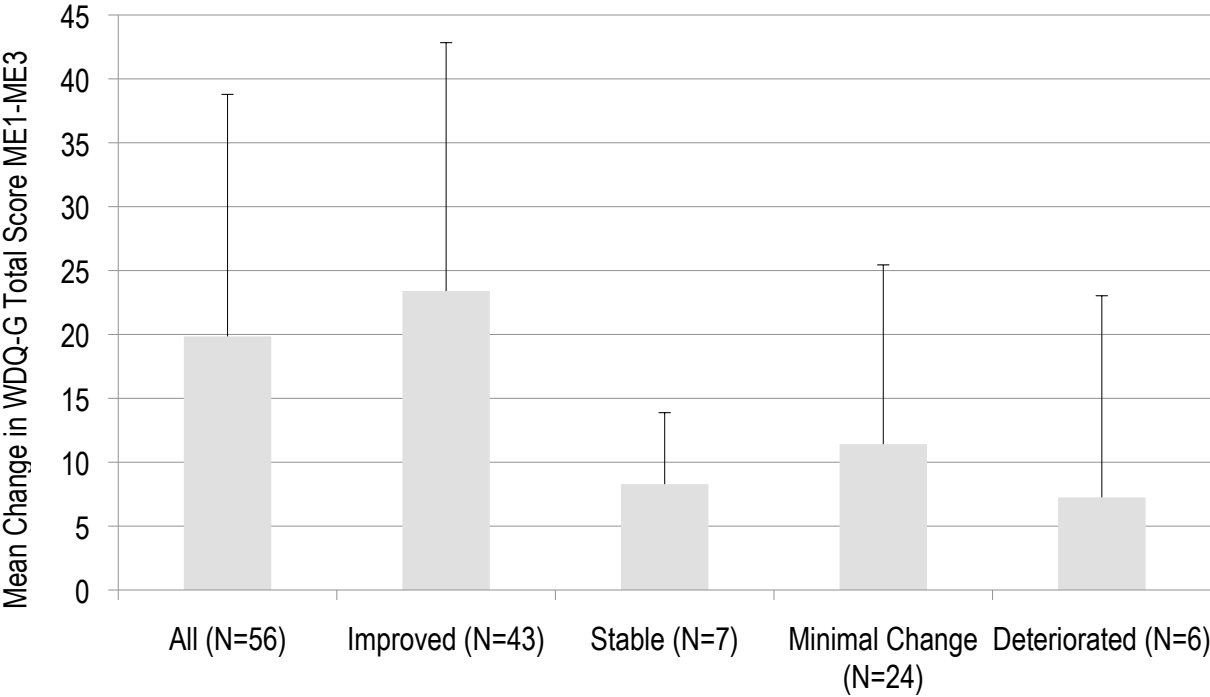

Supplement: MOESM2 [file 9559232]
